# Supplementary material for: Successful treatment and FDG-PET/CT monitoring of HHV-6 encephalitis in a non-neutropenic patient: case report and literature review
Source: Springer Nature journal article supplement (doi:10.1007/s13365-017-0566-4), 2017-08-18
Supplement: MOESM1 [file 14225098]

**Supplemental Material**

Analysis performed on cerebrospinal fluid (CSF) and serum that resulted negative included:

CSF:

- Detection of human herpesvirus 1 (HHV-1) DNA, human herpesvirus 2 (HHV-2) DNA, Epstein Barr virus (EBV) DNA, Varicella Zoster virus (VZV) DNA, Cytomegalovirus (CMV) DNA, human immunodeficiency virus (HIV) RNA, and JC virus DNA by real-time PCR
- Standard bacterial CSF cultures
- Antibodies directed against onconeuronal antigens, including NMDA receptor, VGKC complex, AMPA 1 and 2 receptors and GABA B receptor

Serum markers:

- Detection of human herpesvirus 1 (HHV-1) DNA, human herpesvirus 2 (HHV-2) DNA, Epstein Barr virus (EBV) DNA, Varicella Zoster virus (VZV) DNA, Cytomegalovirus (CMV) DNA, human immunodeficiency virus (HIV) RNA, HHV-6 DNA by real-time PCR
